# Supplementary material for: Inorganic Phosphate-Induced Extracellular Vesicles from Vascular Smooth Muscle Cells Contain Elevated Levels of Hyaluronic Acid, Which Enhance Their Interaction with Very Small Superparamagnetic Iron Oxide Particles
Source: MDPI journal article supplement (doi:10.3390/ijms25052571), 2024-02-22
Supplement: s1 [file s1]

## Supplemental Figure S2.

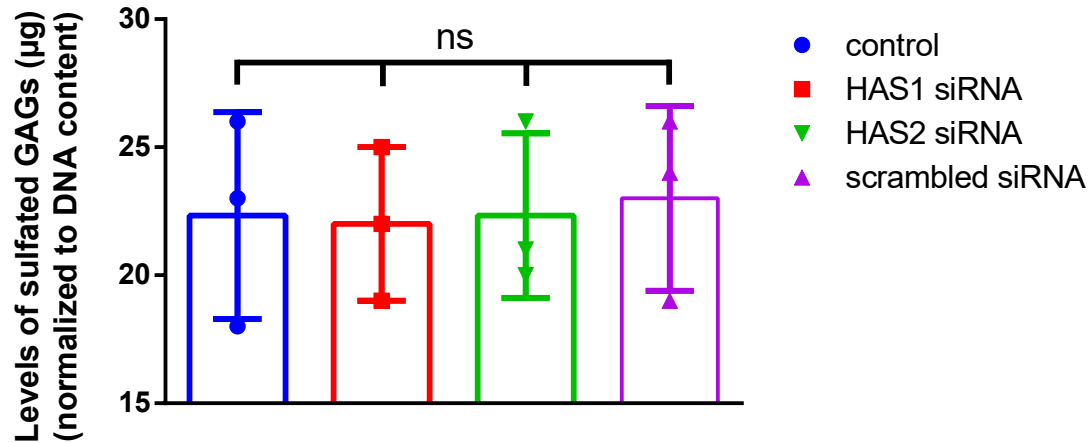

### Supplemental Figure S2.

**Effects of HAS1 and HAS2 specific siRNA on the contents of sulfated GAGs in VSMC.** VSMC were transfected with siRNA specific for HAS1, HAS1 or a scrambled control siRNA (Silencer®, Thermo-fisher) for 48 h by using the HiPerFect Transfection Reagent (Qiagen, Hilden, Germany). This was followed by an additional incubation of 24 h without siRNA and transfection reagent. Cells were then directly subjected to respective analyses. To isolate EV, the cells were incubated for additional 24 h with standard culture medium containing 5% exosome-depleted FBS (ThermoFisher) and EV were isolated from supernatants as described [1]. GAG contents in cells and isolated EVs were determined using the Blyscan™ assay as described [1]. Shown are means  $\pm$  SD from three independent experiments.

[1] Freise C., Zappe A., Löwa N., (...), Wiekhorst F. and Taupitz M. Uremic toxin-induced exosome-like extracellular vesicles contain enhanced levels of sulfated glycosaminoglycans which facilitate the interaction with very small superparamagnetic iron oxide particles. *Int J Mol Sci*, 2023; 24, 14253. doi: 10.3390/ijms241814253
